# Supplementary material
Source: Royal Society of Chemistry journal article supplement (doi:10.1039/d6ce00368k)
Supplement: d6ce00368k1.pdf [file d6ce00368k1.pdf]

## Supplementary Information

### Successive cation and anion exchange strategy towards hierarchical Ni-Co sulfide arrays for high-performance hybrid supercapacitors

#### Experimental

##### Materials characterization

The crystal structures of materials were recorded by the X-ray diffractometer (XRD). The morphology of the samples was characterized by scanning electron microscopy (SEM). The elemental mapping was tested by the energy-dispersive X-ray spectroscope (EDS) equipped on SEM.

##### Electrochemical measurements

The Ni foam supported electroactive materials was directly used as work electrode for performance evaluation. The electrode was cut into a size of 1 cm × 1 cm with a mass loadings of electroactive materials around 4.8 mg cm<sup>-2</sup>. The performance were measured using 6 M KOH electrolyte in a classical three-electrode configuration with Hg/HgO reference electrode and Pt foil counter electrode. The cyclic voltammetry (CV), galvanostatic charge-discharge (GCD) and electrochemical impedance spectroscopy (EIS) were tested using a CHI 660E electrochemical workstation. The EIS spectra were tested at the open circuit potential with an ac perturbation of 5 mV. The specific capacity values were calculated from the GCD curves using:

$$C=I\Delta t/m \quad (1)$$

where  $C$  (C g<sup>-1</sup>) is the specific capacity,  $I$  (A g<sup>-1</sup>) is the discharge current,  $\Delta t$  (s) is the discharge time and  $m$  (g) is the mass loading of the electroactive material.

The HSCs were assembled using Ni-Co-S-30 sulfides as the positive electrode and reduced graphene oxidized (RGO) as the negative electrode. The mass loadings of the two electrodes were calculated by this equation:  $m_+/m_-=C_-/C_+$ , where  $C$  was calculated from the CV curves at 5 mV s<sup>-1</sup>, and  $m$  is the mass loading of the two electrodes. The specific energy and specific power of the HSC device were calculated from the GCD curves using the following equations:

$$E = \frac{1}{3.6} I_s \int_0^{V_{max}} V dt \quad (2)$$

$$P = \frac{3.6E}{\Delta t} \quad (3)$$

where  $E$  ( $\text{W h kg}^{-1}$ ) is the specific energy,  $P$  ( $\text{kW kg}^{-1}$ ) is the specific power, and  $V$  (in V) is the voltage of the HSC device.

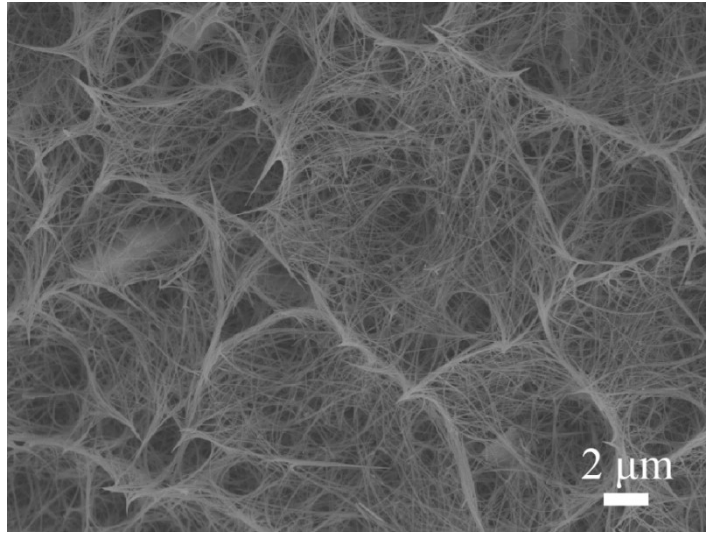

**Fig. S1** SEM image of  $\text{Co}(\text{CO}_3)_{0.5}\text{OH}$  sample.

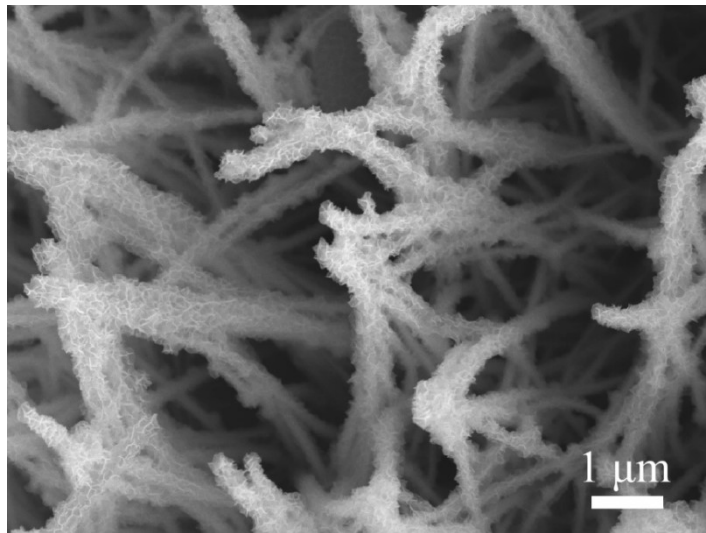

**Fig. S2** SEM image of NiCo-15 sulfide sample.

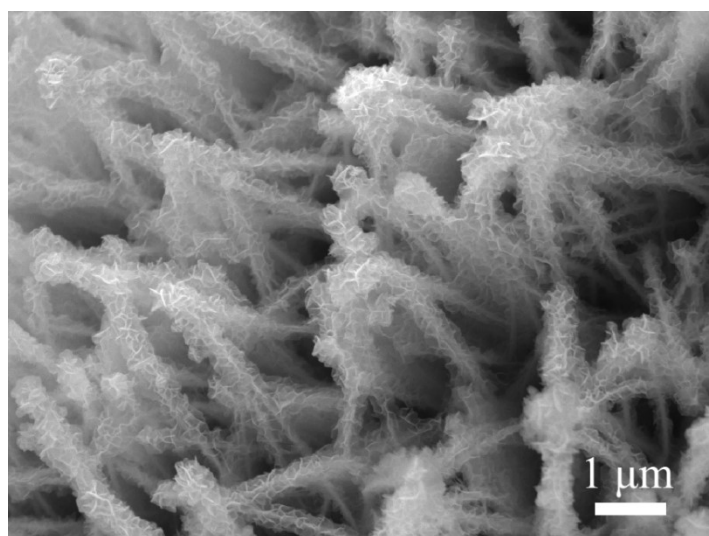

**Fig. S3** SEM image of NiCo-45 sulfide sample.

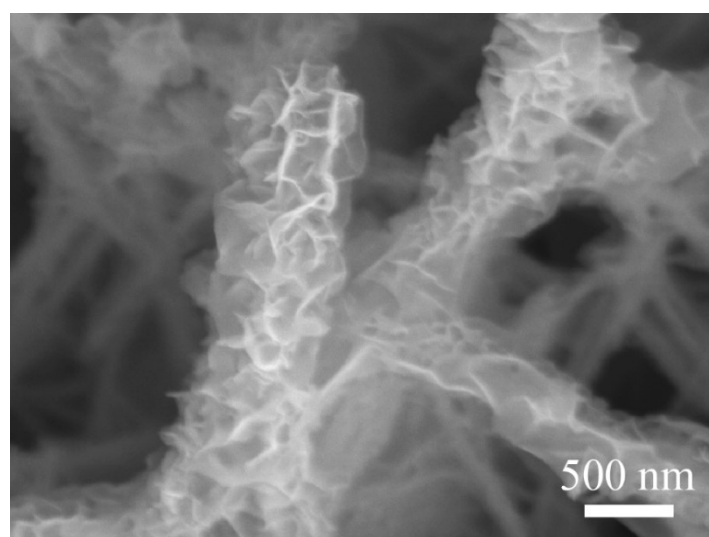

**Fig. S4** SEM image of NiCo-60 sulfide sample.

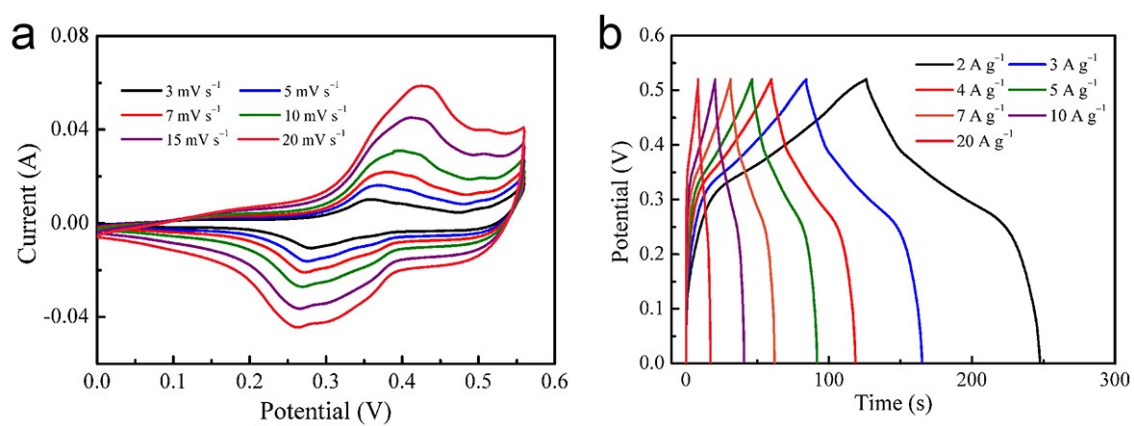

**Fig. S5** (a) CV curves at various scan rates and (b) GCD curves at different specific currents of Co sulfide.

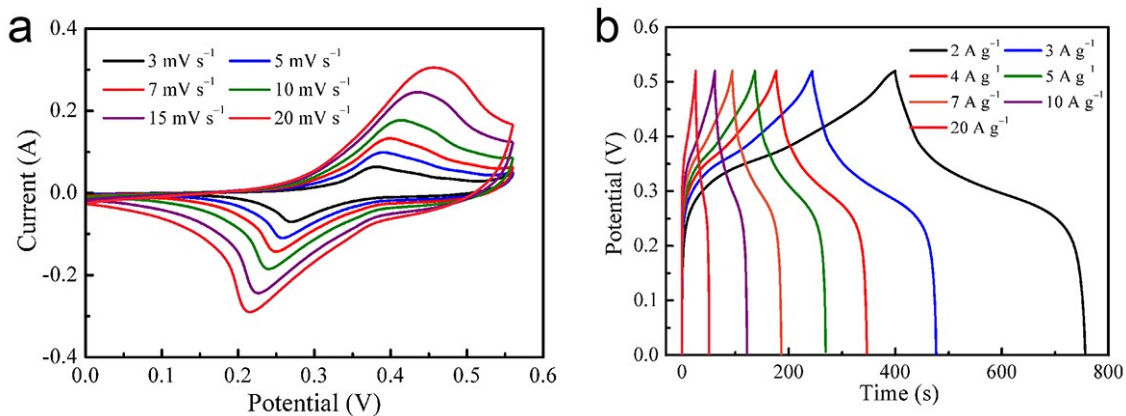

**Fig. S6** (a) CV curves at various scan rates and (b) GCD curves at different specific currents of NiCo-15.

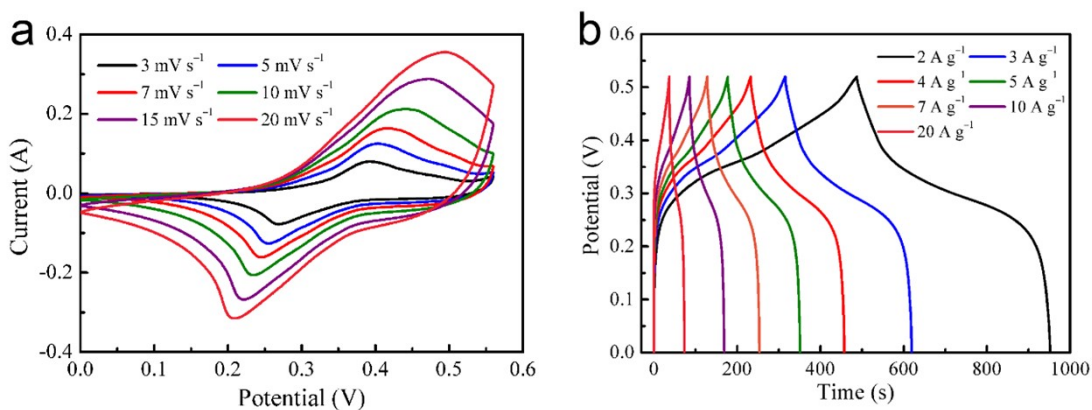

**Fig. S7** (a) CV curves at various scan rates and (b) GCD curves at different specific currents of NiCo-30.

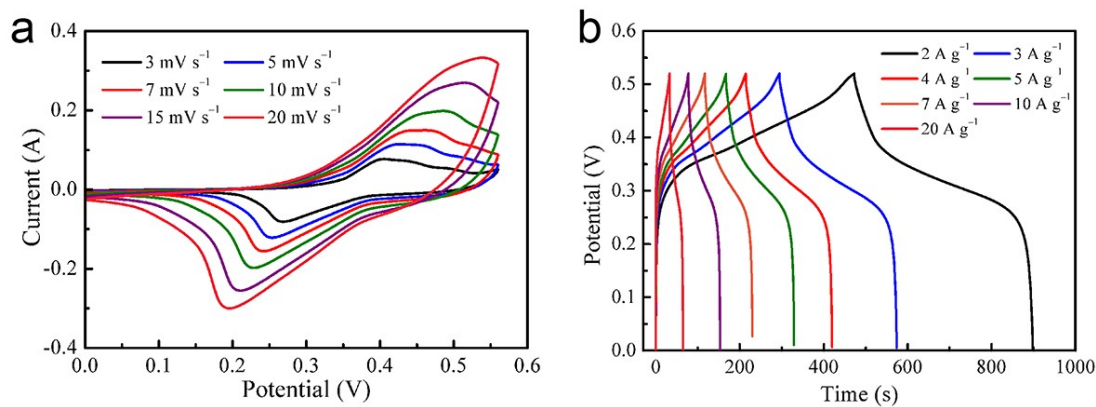

**Fig. S8** (a) CV curves at various scan rates and (b) GCD curves at different specific currents of NiCo-45.

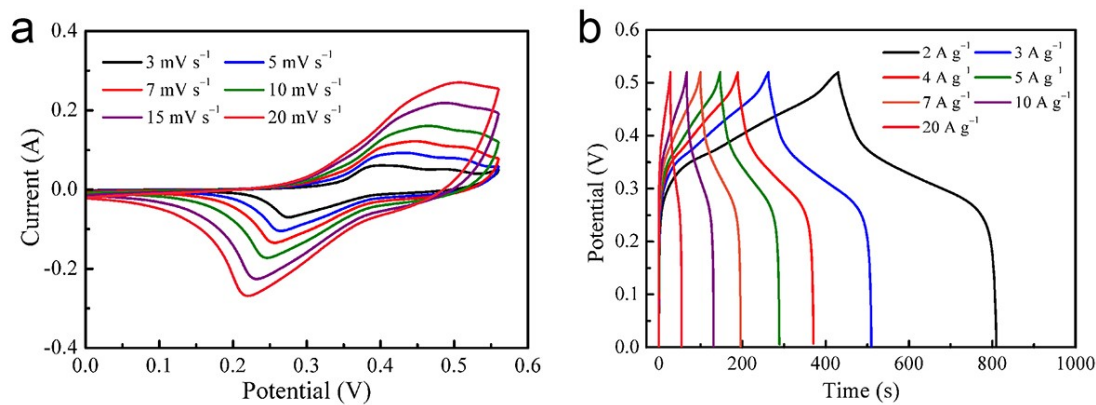

**Fig. S9** (a) CV curves at various scan rates and (b) GCD curves at different specific currents of NiCo-60.

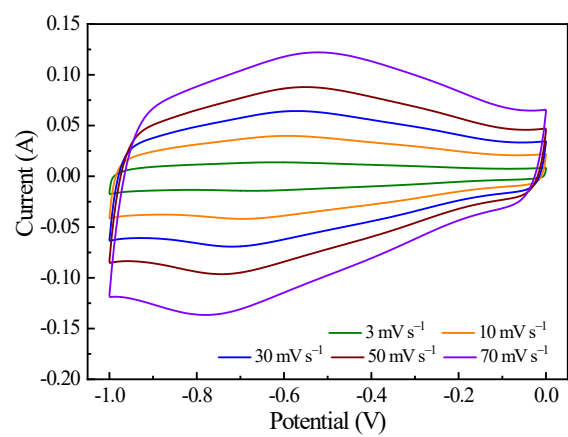

**Fig. S10** CV curves at various scan rates of the RGO electrode.
